# Supplementary material
Source: ML conference proceedings conference paper supplement (https://proceedings.mlr.press/v119/raj20a.html)
Supplement: Supplementary file 1 [file raj20a-supp.pdf]

# Improving Robustness of Deep-Learning-Based Image Reconstruction - Supplementary Material

**Proof of Theorem 1:**

For the inverse problem of recovering the true  $x$  from the measurement  $y = Ax$ , goal is to design a robust linear recovery model given by  $\hat{x} = BAx$

The min-max formulation to get robust model for a linear set-up:

$$\begin{aligned} & \min_B \max_{\delta: \|\delta\|_2 \leq \epsilon} \mathbb{E}_{x \in D} \|BAx - x\|^2 + \lambda \|B(Ax + \delta) - x\|^2 \\ & \min_B \max_{\delta: \|\delta\|_2 \leq \epsilon} \mathbb{E}_{x \in D} (1 + \lambda) \|BAx - x\|^2 + \lambda \|B\delta\|^2 + 2\lambda (B\delta)^T (BAx - x) \end{aligned} \quad (1)$$

Since the data is normalized, i.e.,  $\mathbb{E}(x) = 0$  and  $cov(x) = I$ . This makes the above optimization problem as:

$$\begin{aligned} & \min_B \max_{\delta: \|\delta\|_2 \leq \epsilon} \mathbb{E}_{x \in D} (1 + \lambda) \|(BA - I)x\|^2 + \lambda \|B\delta\|^2 \\ & \min_B \max_{\delta: \|\delta\|_2 \leq \epsilon} \mathbb{E}_{x \in D} (1 + \lambda) tr(BA - I)xx^T (BA - I)^T + \lambda \|B\delta\|^2 \end{aligned} \quad (2)$$

Since,  $\mathbb{E}(tr(\cdot)) = tr(\mathbb{E}(\cdot))$ , the above problem becomes:

$$\begin{aligned} & \min_B \max_{\delta: \|\delta\|_2 \leq \epsilon} (1 + \lambda) tr(BA - I)(BA - I)^T + \lambda \|B\delta\|^2 \\ & \min_B \max_{\delta: \|\delta\|_2 \leq \epsilon} (1 + \lambda) \|BA - I\|_F^2 + \lambda \|B\delta\|^2 \end{aligned} \quad (3)$$

Using SVD decomposition of  $A = USV^T$  and  $B = MQP^T$

$$\min_{M, Q, P: M^T M = I, P^T P = I, Q \text{ is diag}} \max_{\delta: \|\delta\|_2 \leq \epsilon} (1 + \lambda) \|MQP^T USV^T - I\|_F^2 + \lambda \|MQP^T \delta\|^2 \quad (4)$$

Since, only the second term is dependent on  $\delta$ , maximizing the second term with respect to  $\delta$ : We have  $\|MQP^T \delta\| = \|QP^T \delta\|$  since  $M$  is unitary. Given  $Q$  is diagonal,  $\|QP^T \delta\|$  w.r.t.  $\delta$  can be maximized by having  $P^T \delta$  vector having all zeros except the location corresponding to the  $\max_i Q_i$ . Since,  $\|P^T \delta\| = \|\delta\|$ , again because  $P$  is unitary, so to maximize within the  $\epsilon$ -ball, we will have  $P^T \delta = \epsilon[0, \dots, 0, 1, 0, \dots, 0]$  where 1 is at the  $\arg \max_i Q_i$  position. This makes the term to be:

$$\max_{\delta: \|\delta\|_2 \leq \epsilon} \|MQP^T \delta\|^2 = \epsilon^2 (\max_i Q_i)^2$$

Substituting the above term in Equation 4:

$$\begin{aligned} & \min_{M, Q, P: M^T M = I, P^T P = I, Q \text{ is diag}} (1 + \lambda) \|MQP^T USV^T - I\|_F^2 + \lambda \epsilon^2 (\max_i Q_i)^2 \\ & \min_{M, Q, P: \dots} (1 + \lambda) tr(MQP^T USV^T - I)(MQP^T USV^T - I)^T + \lambda \epsilon^2 (\max_i Q_i)^2 \\ & \min_{M, Q, P: \dots} (1 + \lambda) tr(MQP^T US^2 U^T PQM^T - 2MQP^T USV^T + I) + \lambda \epsilon^2 (\max_i Q_i)^2 \\ & \min_{M, Q, P: \dots} (1 + \lambda) tr(P^T US^2 U^T PQ^2 - 2MQP^T SV^T + I) + \lambda \epsilon^2 (\max_i Q_i)^2 \end{aligned} \quad (5)$$

For the above equation, only the second term depends on  $M$ , minimizing the second term w.r.t.  $M$  keeping others fixed:

$$\min_{M: M^T M = I} tr(-2MQP^T USV^T)$$

Since, this is a linear program with the quadratic constraint, relaxing the constraint from  $M^T M = I$  to  $M^T M \leq I$  won't change the optimal point as the optimal point will always be at the boundary i.e.  $M^T M = I$

$$\min_{M: M^T M \leq I} \text{tr}(-2MQP^T USV^T) \text{ which is a convex program}$$

Introducing the Lagrange multiplier matrix  $K$  for the constraint

$$\mathcal{L}(M, K) = \text{tr}(-2MQP^T USV^T + K(M^T M - I))$$

Substituting  $G = QP^T USV^T$  and using stationarity of Lagrangian

$$\Delta L_M = M(K + K^T) - G^T = 0 \implies ML = G^T \text{ where } L = K + K^T$$

Primal feasibility:  $M^T M \leq I$ . Optimal point at boundary  $\implies M^T M = I$

Because of the problem is convex, the local minima is the global minima which satisfies the two conditions: Stationarity of Lagrangian ( $ML = G^T$ ) and Primal feasibility ( $M^T M = I$ ). By the choice of  $M = V$ , and  $L = SU^T PQ$ , both these conditions are satisfied implying  $M = V$  is the optimal point.

Substituting  $M = V$  in Equation 5, we get:

$$\begin{aligned} & \min_{Q, P: \dots} (1 + \lambda) \text{tr}(P^T US^2 U^T PQ^2 - 2VQP^T USV^T + I) + \lambda \epsilon^2 (\max_i Q_i)^2 \\ & \min_{Q, P: \dots} (1 + \lambda) \text{tr}(P^T US^2 U^T PQ^2 - 2QP^T US + I) + \lambda \epsilon^2 (\max_i Q_i)^2 \\ & \min_{Q, P: \dots} (1 + \lambda) \|QP^T US - I\|_F^2 + \lambda \epsilon^2 (\max_i Q_i)^2 \end{aligned} \quad (6)$$

Denote the  $i$ -th column of  $C = U^T P$  by  $c_i$  and the entries in  $Q$  are in decreasing order (as entries in  $S$  are in increasing order) and the largest entry  $q_m$  in  $Q$ , has multiplicity  $m$ , the Equation 6 becomes:

$$\min_{C, Q} (1 + \lambda) \sum_{i=1}^m \|q_m S c_i - e_i\|^2 + \lambda \epsilon^2 q_m^2 + (1 + \lambda) \sum_{i=m+1}^n \|q_i S c_i - e_i\|^2 \quad (7)$$

If we consider the last term i.e.  $i > m$ , it can be minimized by setting  $c_i = e_i$  which is equivalent to choose  $P_i = U_i$  and  $q_i = 1/s_i$ . This makes the last term ( $= 0$ ), using  $h = \lambda \epsilon^2 / (1 + \lambda)$ , making the Equation 7 as:

$$\begin{aligned} & \min_{C, Q} \sum_{i=1}^m (c_i^T S q_m^2 S c_i - 2e_i^T q_m S c_i + e_i^T e_i) + h q_m^2 \\ & \min_{C, Q} q_m^2 \left( \sum_{i=1}^m c_i^T S^2 c_i + h \right) - 2q_m \sum_{i=1}^m S_i C_{ii} + \sum_{i=1}^m e_i^T e_i \end{aligned}$$

The above term is upward quadratic in  $q_m$ , minima w.r.t.  $q_m$  will occur at  $q_m^* = \frac{\sum_{i=1}^m S_i C_{ii}}{(\sum_{i=1}^m c_i^T S^2 c_i + h)}$ , which will make the quadratic term as  $\sum_{i=1}^m e_i^T e_i - \frac{(\sum_{i=1}^m S_i C_{ii})^2}{(\sum_{i=1}^m c_i^T S^2 c_i + h)}$ , which has to be minimized w.r.t  $C$

$$\begin{aligned} & \min_C \sum_{i=1}^m e_i^T e_i - \frac{(\sum_{i=1}^m S_i C_{ii})^2}{(\sum_{i=1}^m c_i^T S^2 c_i + h)} \\ & \max_C \frac{(\sum_{i=1}^m S_i C_{ii})^2}{(\sum_{i=1}^m c_i^T S^2 c_i + h)} \\ & \max_C \frac{(\sum_{i=1}^m S_i C_{ii})^2}{\sum_{i=1}^m S_i^2 C_{ii}^2 + \sum_{j \neq i} S_j^2 C_{ij}^2 + h} \end{aligned} \quad (8)$$

Since  $C = U^T P \implies C_{ij} = u_i^T p_j \implies \|C_{ij}\| \leq 1$ . To maximize the term given by the Equation 8, we can minimize the denominator by setting the term  $C_{ij} = 0$ , which makes the matrix  $C$  as diagonal.

Divide the matrix  $U$  and  $P$  into two parts: one corresponding to  $i \leq m$  and another  $i > m$ , where  $i$  represents the column-index of  $C = U^T P$ .

Let  $U = [U_1|U_2]$  and  $P = [P_1|P_2]$ . From above, we have  $P_2 = U_2$  for  $i > m$ , making  $P = [P_1|U_2]$ .

$$U^T = \begin{bmatrix} U_1^T \\ U_2^T \end{bmatrix} \text{ and } P = [P_1|U_2]$$

$$U^T P = \begin{bmatrix} U_1^T P_1 & U_1^T U_2 \\ U_2^T P_1 & U_2^T U_2 \end{bmatrix} = \begin{bmatrix} U_1^T P_1 & \mathbf{0} \\ U_2^T P_1 & I \end{bmatrix}$$

Since,  $U^T P$  is diagonal, we have  $U_2^T P_1 = \mathbf{0}$ ,  $U_1^T P_1 = \Gamma$  where  $\Gamma$  is diagonal. Also, we have  $P_1^T P_1 = I$ . Only way to satisfy this would be making  $P_1 = U_1$  which makes  $P = U$  and  $C = I$ . It also results in

$$q_m^* = \frac{\sum_{i=1}^m S_i}{\sum_{i=1}^m S_i^2 + h}, \text{ where, } h = \epsilon^2 \frac{\lambda}{1 + \lambda} \quad (9)$$

Hence, the resulting  $B$  would be of the form  $MQP^T$  where:

$$M = V, P = U \text{ and } , \quad (10)$$

$$Q = \begin{bmatrix} q_m^* & 0 & \dots & 0 \\ 0 & q_m^* & \dots & 0 \\ \vdots & \vdots & \vdots & \vdots \\ \vdots & \vdots & \vdots & \vdots \\ 0 & \dots & 1/s_{m+1} & \dots \\ \vdots & \vdots & \vdots & \vdots \\ \vdots & \vdots & \vdots & \vdots \\ 0 & \dots & 0 & 1/s_n \end{bmatrix} \quad (11)$$
